# Supplementary material
Source: publisher figshare collection journal article supplement (https://acs.figshare.com/ndownloader/files/3924817)
Supplement: Supplementary file 1 [file 3924817]

**Supporting Information:**

**Control of Branching in  $\text{Ni}_3\text{C}_{1-x}$  Nanoparticles and their  
Conversion into  $\text{Ni}_{12}\text{P}_5$  Nanoparticles**

**Mehmet F. Sarac, Wei-Chen Wu, Joseph B. Tracy\***

Department of Materials Science and Engineering, North Carolina State University, Raleigh,  
North Carolina 27695, United States

### Additional HRTEM Images

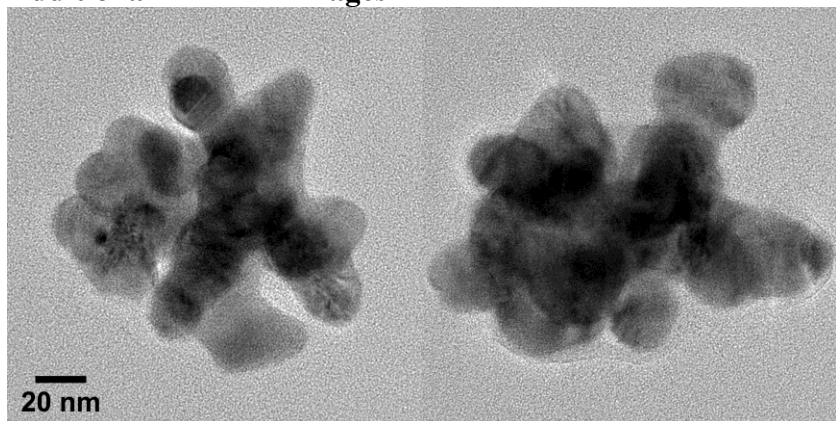

**Figure S1.** HRTEM images (common scale bar) of the sample grown in ODE at 230 °C for 30 min without TOP (corresponding to Figure 1a).

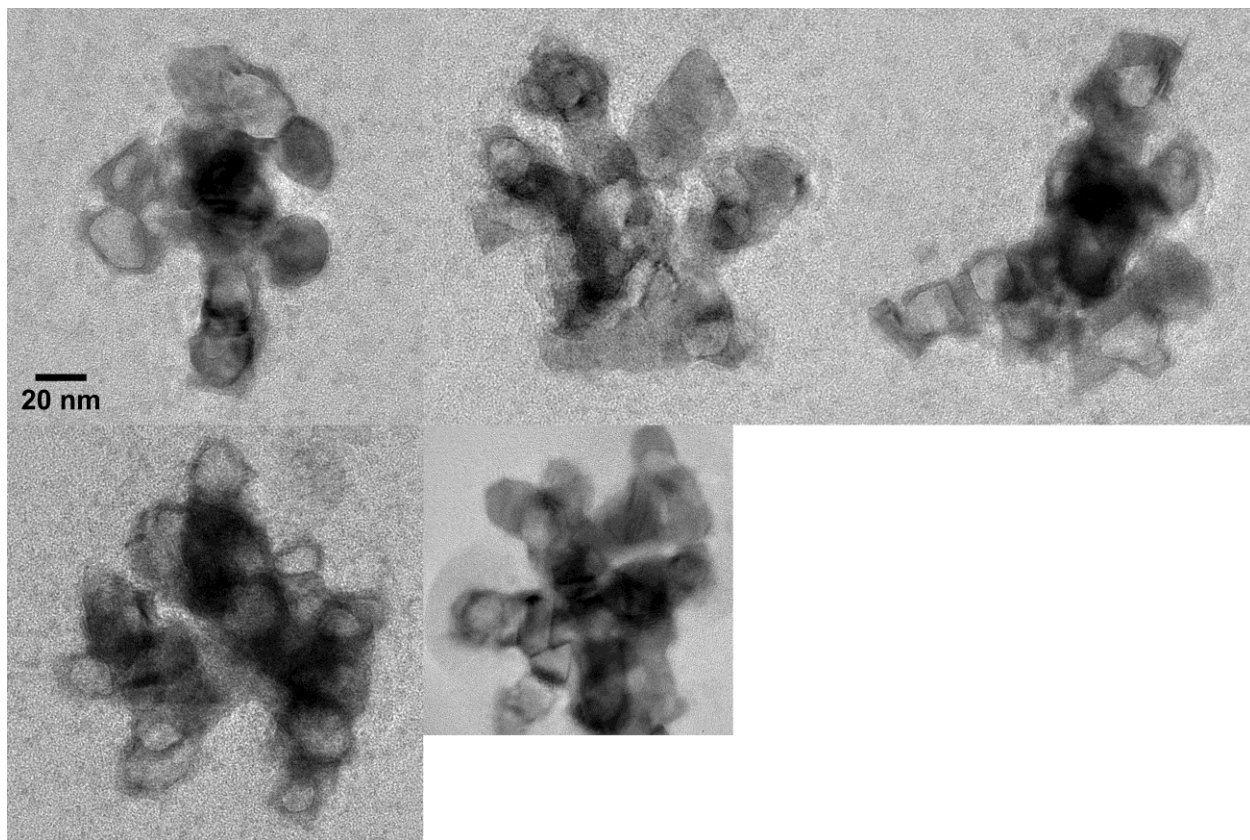

**Figure S2.** HRTEM images (common scale bar) of the sample grown in ODE at 230 °C for 30 min without TOP, followed by conversion into  $\text{Ni}_{12}\text{P}_5$  after adding 0.3 mL TOP and heating at 300 °C for 30 min (corresponding to Figure 2a).

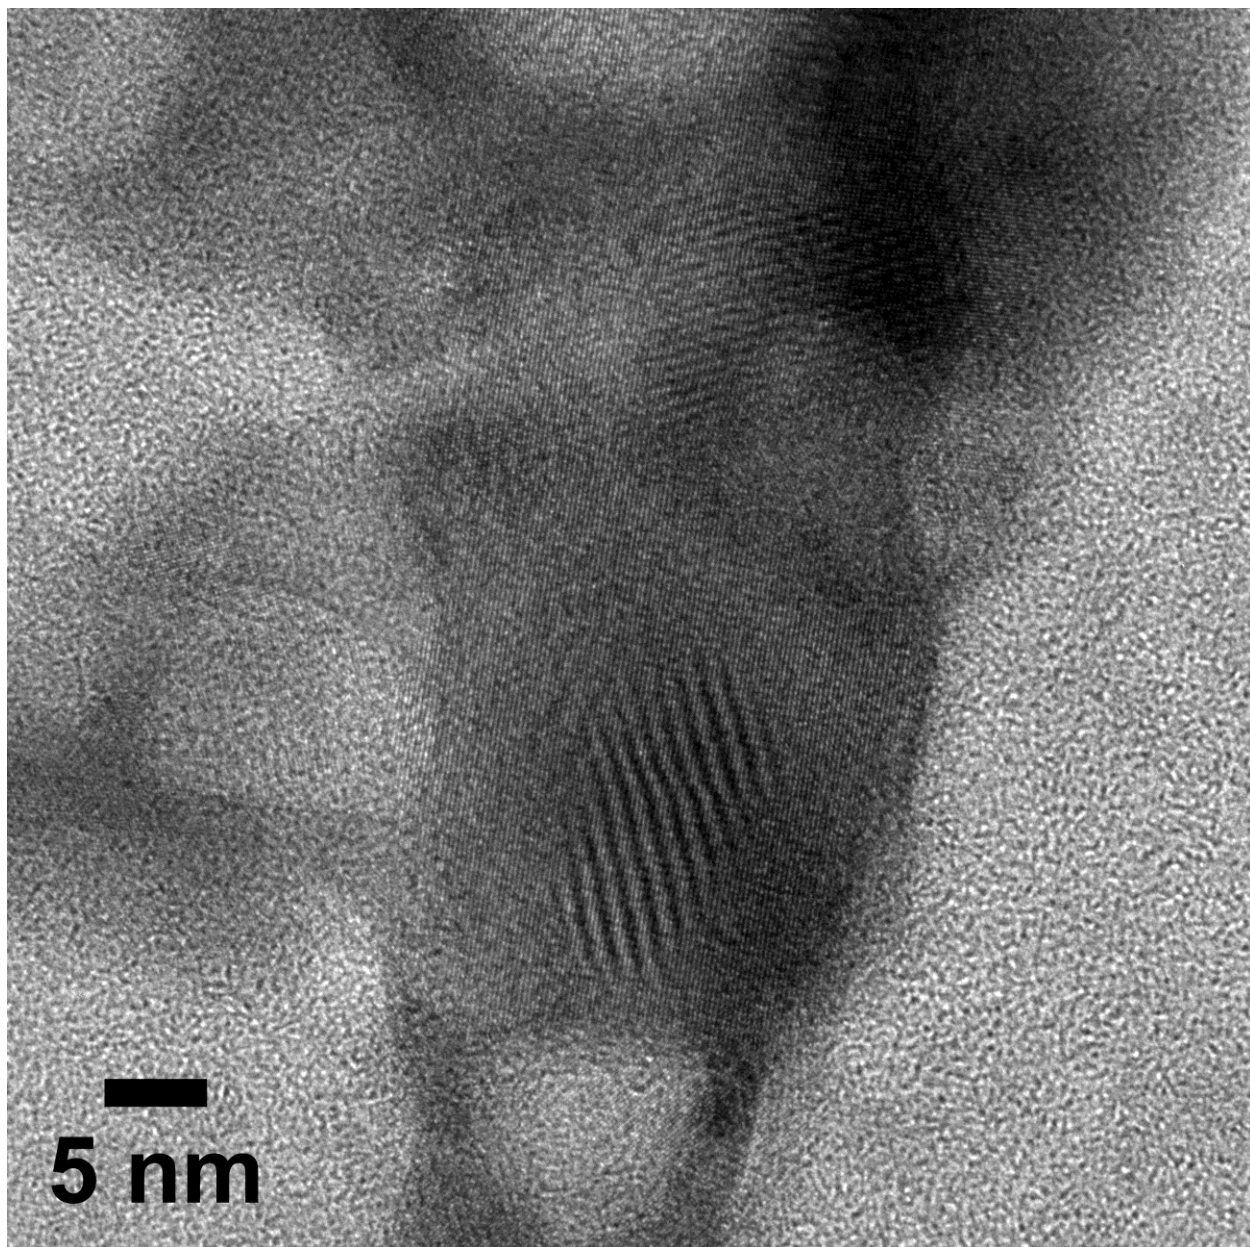

**Figure S3.** Additional HRTEM image showing the lattice of part of the Ni<sub>12</sub>P<sub>5</sub> nanoparticle shown in Figure 3b, which was initially grown in ODE at 230 °C for 30 min without TOP, followed by conversion into Ni<sub>12</sub>P<sub>5</sub> after adding 0.3 mL TOP and heating at 300 °C for 30 min.

# TEM Images and XRD for Samples Prepared Using Oleylamine Only or 99.5% 1-Octadecene

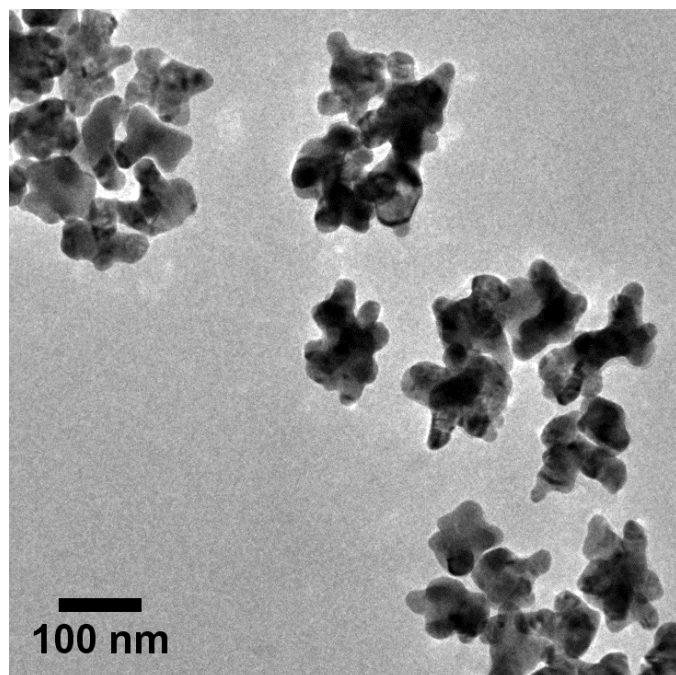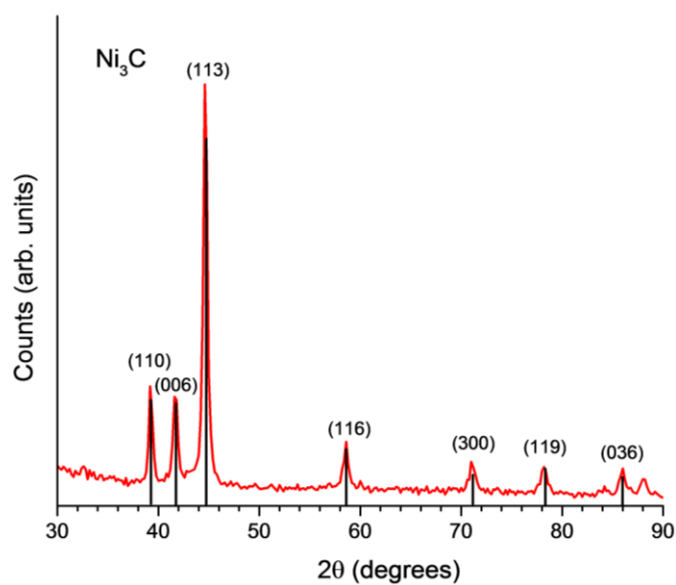

**Figure S4.** TEM image and powder XRD of dendritic  $\text{Ni}_3\text{C}_{1-x}$  nanoparticles grown in 99.5% ODE at 230 °C for 30 min without TOP. Reference XRD pattern for  $\text{Ni}_3\text{C}$  is shown as a stick spectrum.

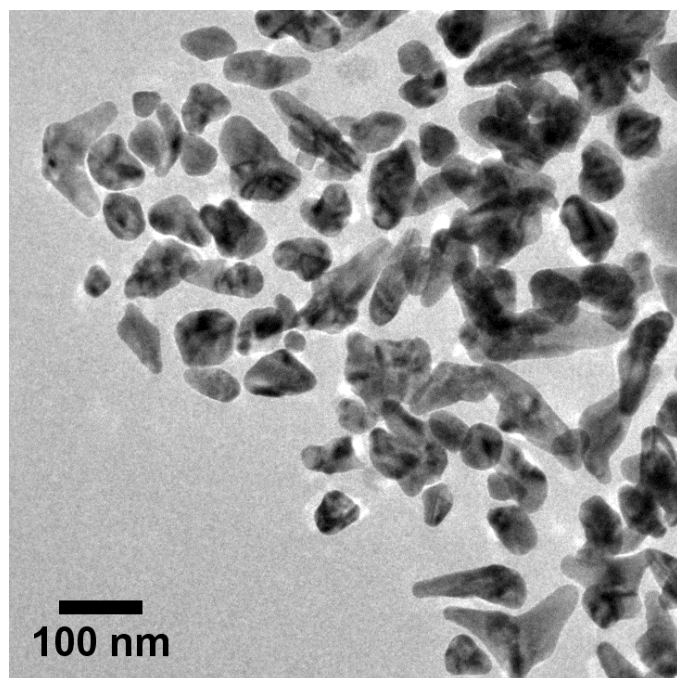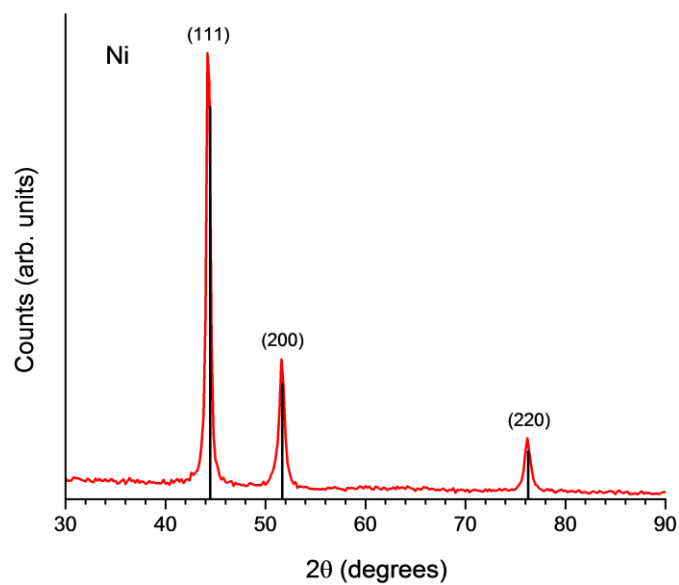

**Figure S5.** TEM image and powder XRD of Ni nanoparticles grown in 10 mL oleylamine at 230 °C for 30 min without TOP and in the absence of any other solvent. Reference XRD pattern for Ni is shown as a stick spectrum.
